# Supplementary material
Source: HighWire-hosted journal article supplement (https://www.cmaj.ca/highwire/filestream/147026/field_highwire_adjunct_files/5/220508-res-6-at.pdf)
Supplement: 220508-res-6-at.pdf [file 220508-res-6-at.pdf]

## Appendix D

## Patient Characteristics

| <b>Patient Characteristics 252 Patients</b> |    |    |    |    |    |    |    |    |    |            |
|---------------------------------------------|----|----|----|----|----|----|----|----|----|------------|
| Province                                    | BC | AB | SK | MB | ON | QC | NB | NS | NL | TOTAL      |
| N                                           | 77 | 21 | 16 | 25 | 43 | 33 | 11 | 22 | 4  | <b>252</b> |
| Sex                                         |    |    |    |    |    |    |    |    |    |            |
| Male                                        | 59 | 15 | 9  | 13 | 31 | 19 | 7  | 11 | 3  | <b>167</b> |
| Female                                      | 18 | 6  | 7  | 12 | 12 | 14 | 4  | 12 | 1  | <b>85</b>  |
| Age                                         |    |    |    |    |    |    |    |    |    |            |
| 0-18                                        | 6  | 4  | 8  | 2  | 2  | 1  | 1  | 0  | 0  | <b>24</b>  |
| 19-30                                       | 18 | 4  | 2  | 5  | 6  | 6  | 3  | 8  | 1  | <b>53</b>  |
| 31-40                                       | 17 | 5  | 1  | 1  | 4  | 2  | 3  | 2  | 2  | <b>37</b>  |
| 41-50                                       | 11 | 2  | 2  | 4  | 2  | 2  | 2  | 6  | 1  | <b>32</b>  |
| 51-60                                       | 10 | 6  | 2  | 7  | 10 | 9  | 0  | 2  | 0  | <b>46</b>  |
| 61-70                                       | 14 | 0  | 1  | 6  | 10 | 7  | 1  | 4  | 0  | <b>43</b>  |
| 71-80                                       | 1  | 0  | 0  | 0  | 9  | 4  | 1  | 0  | 0  | <b>15</b>  |
| >81                                         | 0  | 0  | 0  | 0  | 0  | 2  | 0  | 0  | 0  | <b>2</b>   |
| Patients by Type of Organ Donation          |    |    |    |    |    |    |    |    |    |            |
| NDD                                         | 50 | 13 | 16 | 16 | 21 | 24 | 11 | 12 | 4  | <b>167</b> |
| DCD                                         | 27 | 8  | 0  | 9  | 22 | 9  | 0  | 10 | 0  | <b>85</b>  |

Appendix 6, as supplied by the authors. Appendix to: Sarti AJ, Sutherland S, Meade M, et al. The experiences of family members of deceased organ donors and suggestions to improve the donation process: a qualitative study. *CMAJ* 2022. DOI: 10.1503/cmaj.220508. Copyright © 2022 The Author(s) or their employer(s). To receive this resource in an accessible format, please contact us at [cmajgroup@cmaj.ca](mailto:cmajgroup@cmaj.ca).

## Appendix D

Appendix 6, as supplied by the authors. Appendix to: Sarti AJ, Sutherland S, Meade M, et al. The experiences of family members of deceased organ donors and suggestions to improve the donation process: a qualitative study. *CMAJ* 2022. DOI: 10.1503/cmaj.220508. Copyright © 2022 The Author(s) or their employer(s). To receive this resource in an accessible format, please contact us at [cmajgroup@cmaj.ca](mailto:cmajgroup@cmaj.ca).
